# Supplementary material
Source: publisher site journal article supplement (https://www.dovepress.com/article/344350)
Supplement: Supplementary file 1 [file get_supplementary_file.php]

**Supplementary Table 1.** Institutional Review Boards Providing Study Approval

Ethics Committee of China-Japan Friendship Hospital

Ethics Committee of General Hospital of Guangzhou Military Command of PLA

Ethics Committee of Peking University Third Hospital

Ethics Committee of Shanghai Ninth People's Hospital, Shanghai Jiao Tong University School of Medicine

Ethics Committee of Union Hospital Affiliated to Tongji Medical College of Huazhong University of Science and Technology
